# Supplementary material for: Fast-spiking GABA circuit dynamics in the auditory cortex predict recovery of sensory processing following peripheral nerve damage
Source: eLife journal article supplement (doi:10.7554/elife.21452), 2017-03-21

Figure 1, Supplemental Figure 1 - Resnik and Polley

**A** *RS unit*

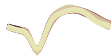

*FS units*

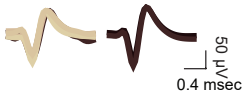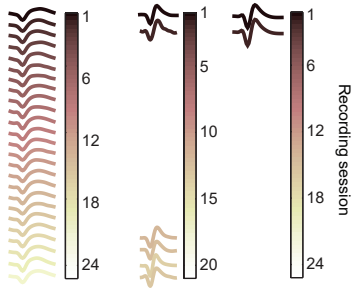

**B**

— FS ouabain — FS Noise-exposed  
— RS ouabain — RS Noise-exposed

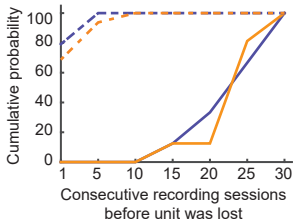

**C**

Percentage of units held for  $\geq 75\%$  of recordings sessions

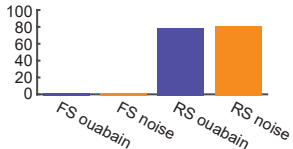

Supplement: supp [file elife-21452-supp-v1.zip]
