# Supplementary material for: Fast-spiking GABA circuit dynamics in the auditory cortex predict recovery of sensory processing following peripheral nerve damage
Source: eLife. 2017 Mar 21;6:e21452. doi: 10.7554/eLife.21452 (PMC5378474; doi:10.7554/eLife.21452)
Supplement: Supplementary file 1. — Detailed description of statistical analysis for all figures and figure supplements. DOI: http://dx.doi.org/10.7554/eLife.21452.009 [file elife-21452-supp1.xlsx]

## Sheet: Sheet1
	Supplementary	table 1 : Statistical analysis
	Figure number	Test	n	units definition	error bars	P value	Degrees of freedom and F value	corrections for multiple comparisons
	1f	anova	53,53	sse continuous units vs. sse random units	mean +/- SEM	p=1.1e-30	F(1)=276.46
	2b	Repeated measures anova	4, 4, 4	mice ABR amplitude	mean +/- SEM	p=3.41e-5	F(2)=13.27
	2b	post hoc analysis		Day -1 vs. day 2		p=2.5e-5		bonferroni
	2b	post hoc analysis		Day -1 vs. day 30		p=0.0318		bonferroni
	2b	post hoc analysis		Day 30 vs. day 2		p=0.014		bonferroni
	2b	Repeated measures anova	4, 4, 4	mice ABR threshold	mean +/- SEM	p=7.8e-14	F(2)=218.15
	2b	post hoc analysis		Day -1 vs. day 2		p=1.27e-13		bonferroni
	2b	post hoc analysis		Day -1 vs. day 30		p=0.076		bonferroni
	2b	post hoc analysis		Day 30 vs. day 2		p=1.83e-12		bonferroni
	2b	Repeated measures anova	4, 4, 4	DPOEs threshold	mean +/- SEM	p=0.0004	F(2)=18.77
	2b	post hoc analysis		Day -1 vs. day 2		p=0.0005		bonferroni
	2b	post hoc analysis		Day -1 vs. day 30		p=0.5156		bonferroni
	2b	post hoc analysis		Day 30 vs. day 2		p=0.003		bonferroni
	2g	Anova	208	overlap across days (sound exposed)	mean +/- SEM	p=1.8e-14	F(12)=10.26
	2g	post hoc analysis		Day -1 vs. day -3		p=8.96		bonferroni
	2g	post hoc analysis		Day -1 vs. day 0		p=0.0001		bonferroni
	2g	post hoc analysis		Day -1 vs. day 1		p=0.00001		bonferroni
	2g	post hoc analysis		Day -1 vs. day 2		p=0.00005		bonferroni
	2g	post hoc analysis		Day -1 vs. day 3		p=0.0011		bonferroni
	2g	post hoc analysis		Day -1 vs. day 4		p=0.00039		bonferroni
	2g	post hoc analysis		Day -1 vs. day 5		p=0.00008		bonferroni
	2g	post hoc analysis		Day -1 vs. day 8		p=0.00005		bonferroni
	2g	post hoc analysis		Day -1 vs. day 15		p=0.011		bonferroni
	2g	post hoc analysis		Day -1 vs. day 25		p=0.013		bonferroni
	2g	post hoc analysis		Day -1 vs. day 35		p=0.233		bonferroni
	2g	post hoc analysis		Day -1 vs. day 45		p=1.619		bonferroni
	2g	Anova	208	Low frequency fr across days (sound exposed)	mean +/- SEM	p=0.0083	F(12)=2.36
	2g	post hoc analysis		Day -1 vs. day -3		p=3.88		bonferroni
	2g	post hoc analysis		Day -1 vs. day 0		p=0.04		bonferroni
	2g	post hoc analysis		Day -1 vs. day 1		p=0.095		bonferroni
	2g	post hoc analysis		Day -1 vs. day 2		p=0.0083		bonferroni
	2g	post hoc analysis		Day -1 vs. day 3		p=0.027		bonferroni
	2g	post hoc analysis		Day -1 vs. day 4		p=0.003		bonferroni
	2g	post hoc analysis		Day -1 vs. day 5		p=0.04		bonferroni
	2g	post hoc analysis		Day -1 vs. day 8		p=0.029		bonferroni
	2g	post hoc analysis		Day -1 vs. day 15		p=1.206		bonferroni
	2g	post hoc analysis		Day -1 vs. day 25		p=0.59		bonferroni
	2g	post hoc analysis		Day -1 vs. day 35		p=3.41e-5		bonferroni
	2g	post hoc analysis		Day -1 vs. day 45		p=1.73		bonferroni
	2g	Anova	208	High frequency fr across days (sound exposed)	mean +/- SEM	p=0.0075	F(12)=2.47
	2g	post hoc analysis		Day -1 vs. day -3		p=5.153		bonferroni
	2g	post hoc analysis		Day -1 vs. day 0		p=0.76		bonferroni
	2g	post hoc analysis		Day -1 vs. day 1		p=0.049		bonferroni
	2g	post hoc analysis		Day -1 vs. day 2		p=0.093		bonferroni
	2g	post hoc analysis		Day -1 vs. day 3		p=1.28e-06		bonferroni
	2g	post hoc analysis		Day -1 vs. day 4		p=1.57		bonferroni
	2g	post hoc analysis		Day -1 vs. day 5		p=0.045		bonferroni
	2g	post hoc analysis		Day -1 vs. day 8		p=0.073		bonferroni
	2g	post hoc analysis		Day -1 vs. day 15		p=0.061		bonferroni
	2g	post hoc analysis		Day -1 vs. day 25		p=0.0058		bonferroni
	2g	post hoc analysis		Day -1 vs. day 35		p=0.0017		bonferroni
	2g	post hoc analysis		Day -1 vs. day 45		p=0.543		bonferroni
	2g	Anova	208	BBN threshold across days (sound exposed)	mean +/- SEM	p=1.65e-25	F(12)=18.65
	2g	post hoc analysis		Day -1 vs. day -3		p=7.2		bonferroni
	2g	post hoc analysis		Day -1 vs. day 0		p=5.28e-07		bonferroni
	2g	post hoc analysis		Day -1 vs. day 1		p=7.58e-06		bonferroni
	2g	post hoc analysis		Day -1 vs. day 2		p=5.25e-05		bonferroni
	2g	post hoc analysis		Day -1 vs. day 3		p=0.0022		bonferroni
	2g	post hoc analysis		Day -1 vs. day 4		p=0.038		bonferroni
	2g	post hoc analysis		Day -1 vs. day 5		p=0.014		bonferroni
	2g	post hoc analysis		Day -1 vs. day 8		p=0.018		bonferroni
	2g	post hoc analysis		Day -1 vs. day 15		p=0.84		bonferroni
	2g	post hoc analysis		Day -1 vs. day 25		p=4.59		bonferroni
	2g	post hoc analysis		Day -1 vs. day 35		p=7.21		bonferroni
	2g	post hoc analysis		Day -1 vs. day 45		p=2.53		bonferroni
	2g	Anova	208	Gain across days (sound exposed)	mean +/- SEM	p=1.36e-07	F(12)=5.67
	2g	post hoc analysis		Day -1 vs. day -3		p=11.69		bonferroni
	2g	post hoc analysis		Day -1 vs. day 0		p=1.69		bonferroni
	2g	post hoc analysis		Day -1 vs. day 1		p=0.037		bonferroni
	2g	post hoc analysis		Day -1 vs. day 2		p=0.026		bonferroni
	2g	post hoc analysis		Day -1 vs. day 3		p=2.72		bonferroni
	2g	post hoc analysis		Day -1 vs. day 4		p=0.402		bonferroni
	2g	post hoc analysis		Day -1 vs. day 5		p=9.06		bonferroni
	2g	post hoc analysis		Day -1 vs. day 8		p=2.84		bonferroni
	2g	post hoc analysis		Day -1 vs. day 15		p=11.06		bonferroni
	2g	post hoc analysis		Day -1 vs. day 25		p=7.79		bonferroni
	2g	post hoc analysis		Day -1 vs. day 35		p=0.76		bonferroni
	2g	post hoc analysis		Day -1 vs. day 45		p=4.36		bonferroni
	2g	Anova	208	Spontaneous FR across days (sound exposed)	mean +/- SEM	p=0.0003	F(12)=3.06
	2g	post hoc analysis		Day -1 vs. day -3		p=1.75		bonferroni
	2g	post hoc analysis		Day -1 vs. day 0		p=2.53		bonferroni
	2g	post hoc analysis		Day -1 vs. day 1		p=0.15		bonferroni
	2g	post hoc analysis		Day -1 vs. day 2		p=0.32		bonferroni
	2g	post hoc analysis		Day -1 vs. day 3		p=0.11		bonferroni
	2g	post hoc analysis		Day -1 vs. day 4		p=0.12		bonferroni
	2g	post hoc analysis		Day -1 vs. day 5		p=0.094		bonferroni
	2g	post hoc analysis		Day -1 vs. day 8		p=0.0061		bonferroni
	2g	post hoc analysis		Day -1 vs. day 15		p=2.44		bonferroni
	2g	post hoc analysis		Day -1 vs. day 25		p=6.35		bonferroni
	2g	post hoc analysis		Day -1 vs. day 35		p=1.82		bonferroni
	2g	post hoc analysis		Day -1 vs. day 45		p=6.12		bonferroni
	2g	Anova	208	Inhibition across days (sound exposed)	mean +/- SEM	p=8.9e-19	F(12)=12.53
	2g	post hoc analysis		Day -1 vs. day -3		p=11.23		bonferroni
	2g	post hoc analysis		Day -1 vs. day 0		p=0.02		bonferroni
	2g	post hoc analysis		Day -1 vs. day 1		p=0.0074		bonferroni
	2g	post hoc analysis		Day -1 vs. day 2		p=0.00002		bonferroni
	2g	post hoc analysis		Day -1 vs. day 3		p=8e-10		bonferroni
	2g	post hoc analysis		Day -1 vs. day 4		p=4.4e-11		bonferroni
	2g	post hoc analysis		Day -1 vs. day 5		p=1.03e-08		bonferroni
	2g	post hoc analysis		Day -1 vs. day 8		p=4.6e-11		bonferroni
	2g	post hoc analysis		Day -1 vs. day 15		p=4.08e-05		bonferroni
	2g	post hoc analysis		Day -1 vs. day 25		p=2.98e-05		bonferroni
	2g	post hoc analysis		Day -1 vs. day 35		p=0.075		bonferroni
	2g	post hoc analysis		Day -1 vs. day 45		p=1.68e-04		bonferroni
	3b	Mixed design anova	3,3,3,3	ABR amplitude - time (recovered vs non recovered)	mean +/- SEM	p=0.79	F(1)=0.07
	3b	Mixed design anova		ABR athreshold - group (Day -1 vs d30)	mean +/- SEM	p=4.3e-7	F(1)=27.84
	3b	Mixed design anova		ABR threshold - interaction	mean +/- SEM	p=0.78	F(1)=0.08
	3b	Mixed design anova	3,3,3,3	ABR threshold - time (recovered vs non recovered)	mean +/- SEM	p=0.59	F(1)=0.3
	3b	Mixed design anova		ABR athreshold - group (Day -1 vs d30)	mean +/- SEM	p=2.8e-9	F(1)=173.42
	3b	Mixed design anova		ABR threshold - interaction	mean +/- SEM	p=0.29	F(1)=1.2
	3b	Mixed design anova	3,3,3,3	DPOEs threshold - time (recovered vs non recovered)	mean +/- SEM	p=0.49	F(1)=0.5
	3b	Mixed design anova		DPOEs threshold - group (Day -1 vs d30)	mean +/- SEM	p=0.433	F(1)=0.65
	3b	Mixed design anova		DPOEs threshold - interaction	mean +/- SEM	p=0.433	F(1)=0.65
	3e	Anova	156	BBN threshold across days (recovered)	mean +/- SEM	p=4.67e-26	F(12)=46.67
	3e	post hoc analysis		Day -1 vs. day -3		p=6.46		bonferroni
	3e	post hoc analysis		Day -1 vs. day 0		p=2.22e-13		bonferroni
	3e	post hoc analysis		Day -1 vs. day 1		p=4.64e-07		bonferroni
	3e	post hoc analysis		Day -1 vs. day 2		p=1.07e-06		bonferroni
	3e	post hoc analysis		Day -1 vs. day 3		p=7.37e-12		bonferroni
	3e	post hoc analysis		Day -1 vs. day 4		p=6.922e-10		bonferroni
	3e	post hoc analysis		Day -1 vs. day 5		p=7.37e12		bonferroni
	3e	post hoc analysis		Day -1 vs. day 8		p=1.94e-15		bonferroni
	3e	post hoc analysis		Day -1 vs. day 15		p=7.88e-07		bonferroni
	3e	post hoc analysis		Day -1 vs. day 25		p=1.22e-10		bonferroni
	3e	post hoc analysis		Day -1 vs. day 35		p=1.28e-06		bonferroni
	3e	post hoc analysis		Day -1 vs. day 45		p=0.0071		bonferroni
	3e	Anova	169	BBN threshold across days (non-recovered)	mean +/- SEM	p=1.12e-101	F(12)=284.4
	3e	post hoc analysis		Day -1 vs. day -3		p=4.29		bonferroni
	3e	post hoc analysis		Day -1 vs. day 0		p=1.16e-10		bonferroni
	3e	post hoc analysis		Day -1 vs. day 1		p=1.16e-10		bonferroni
	3e	post hoc analysis		Day -1 vs. day 2		p=4.18e-10		bonferroni
	3e	post hoc analysis		Day -1 vs. day 3		p=2.5e-08		bonferroni
	3e	post hoc analysis		Day -1 vs. day 4		p=4.47e-05		bonferroni
	3e	post hoc analysis		Day -1 vs. day 5		p=2.17e-07		bonferroni
	3e	post hoc analysis		Day -1 vs. day 8		p=6.75e-11		bonferroni
	3e	post hoc analysis		Day -1 vs. day 15		p=1.91e-36		bonferroni
	3e	post hoc analysis		Day -1 vs. day 25		p=2.36e-21		bonferroni
	3e	post hoc analysis		Day -1 vs. day 35		p=1.64e-14		bonferroni
	3e	post hoc analysis		Day -1 vs. day 45		p=1.16e-10		bonferroni
	3e	Anova	156	BBN threshold across days (control)	mean +/- SEM	p=0.28	F(12)=01.27
	3f	Anova	156	gain across days (recovered)	mean +/- SEM	p=1.39e-05	F(12)=5.1
	3f	post hoc analysis		Day -1 vs. day -3		p=11.6		bonferroni
	3f	post hoc analysis		Day -1 vs. day 0		p=0.255		bonferroni
	3f	post hoc analysis		Day -1 vs. day 1		p=0.009		bonferroni
	3f	post hoc analysis		Day -1 vs. day 2		p=0.002		bonferroni
	3f	post hoc analysis		Day -1 vs. day 3		/		bonferroni
	3f	post hoc analysis		Day -1 vs. day 4		/		bonferroni
	3f	post hoc analysis		Day -1 vs. day 5		/		bonferroni
	3f	post hoc analysis		Day -1 vs. day 8		0.0001		bonferroni
	3f	post hoc analysis		Day -1 vs. day 15		0.0016		bonferroni
	3f	post hoc analysis		Day -1 vs. day 25		0.0002		bonferroni
	3f	post hoc analysis		Day -1 vs. day 35		0.008		bonferroni
	3f	post hoc analysis		Day -1 vs. day 45		0.0053		bonferroni
	3f	Anova	156	gain across days (control)	mean +/- SEM	p=0.19	F(12)=1.4
	3g	Anova	156	Spontaneous FR across days (recovered)	mean +/- SEM	p=0.0008	F(12)=2.84
	3g	post hoc analysis		Day -1 vs. day -3		p=0.15		bonferroni
	3g	post hoc analysis		Day -1 vs. day 0		p=1.19		bonferroni
	3g	post hoc analysis		Day -1 vs. day 1		p=0.209		bonferroni
	3g	post hoc analysis		Day -1 vs. day 2		p=1.32		bonferroni
	3g	post hoc analysis		Day -1 vs. day 3		p=0.0003		bonferroni
	3g	post hoc analysis		Day -1 vs. day 4		p=0.312		bonferroni
	3g	post hoc analysis		Day -1 vs. day 5		p=11.23		bonferroni
	3g	post hoc analysis		Day -1 vs. day 8		p=8.08		bonferroni
	3g	post hoc analysis		Day -1 vs. day 15		p=0.37		bonferroni
	3g	post hoc analysis		Day -1 vs. day 25		p=10.8		bonferroni
	3g	post hoc analysis		Day -1 vs. day 35		p=4.17		bonferroni
	3g	post hoc analysis		Day -1 vs. day 45		p=2.02		bonferroni
	3g	Anova	169	Spontaneous FR across days (non-recovered)	mean +/- SEM	p=9.63e-07	F(12)=4.44
	3g	post hoc analysis		Day -1 vs. day -3		p=0.3		bonferroni
	3g	post hoc analysis		Day -1 vs. day 0		p=0.0025		bonferroni
	3g	post hoc analysis		Day -1 vs. day 1		p=0.532		bonferroni
	3g	post hoc analysis		Day -1 vs. day 2		p=0.01		bonferroni
	3g	post hoc analysis		Day -1 vs. day 3		p=0.008		bonferroni
	3g	post hoc analysis		Day -1 vs. day 4		p=0.0056		bonferroni
	3g	post hoc analysis		Day -1 vs. day 5		p=0.023		bonferroni
	3g	post hoc analysis		Day -1 vs. day 8		p=1.62e-07		bonferroni
	3g	post hoc analysis		Day -1 vs. day 15		p=4.01e-04		bonferroni
	3g	post hoc analysis		Day -1 vs. day 25		p=0.108		bonferroni
	3g	post hoc analysis		Day -1 vs. day 35		p=0.32		bonferroni
	3g	post hoc analysis		Day -1 vs. day 45		p=0.207		bonferroni
	3g	Anova	156	Spontaneous FR across days (control)	mean +/- SEM	p=0.007	F(12)=2.47
	3g	post hoc analysis		Day -1 vs. day -3		p=9.25		bonferroni
	3g	post hoc analysis		Day -1 vs. day 0		p=9.89		bonferroni
	3g	post hoc analysis		Day -1 vs. day 1		p=10.03		bonferroni
	3g	post hoc analysis		Day -1 vs. day 2		p=1.31		bonferroni
	3g	post hoc analysis		Day -1 vs. day 3		p=10.78		bonferroni
	3g	post hoc analysis		Day -1 vs. day 4		p=6.06		bonferroni
	3g	post hoc analysis		Day -1 vs. day 5		p=0.649		bonferroni
	3g	post hoc analysis		Day -1 vs. day 8		p=10.67		bonferroni
	3g	post hoc analysis		Day -1 vs. day 15		p=1.79		bonferroni
	3g	post hoc analysis		Day -1 vs. day 25		p=3.96		bonferroni
	3g	post hoc analysis		Day -1 vs. day 35		p=0.015		bonferroni
	3g	post hoc analysis		Day -1 vs. day 45		p=0.166		bonferroni
	3h	Anova	156	Inhibition across days (recovered)	mean +/- SEM	p=4.09e-42	F(12)=33.76
	3h	post hoc analysis		Day -1 vs. day -3		p=9.95		bonferroni
	3h	post hoc analysis		Day -1 vs. day 0		p=1.6e-08		bonferroni
	3h	post hoc analysis		Day -1 vs. day 1		p=1.77e-08		bonferroni
	3h	post hoc analysis		Day -1 vs. day 2		p=1.32e-09		bonferroni
	3h	post hoc analysis		Day -1 vs. day 3		p=6.4e-07		bonferroni
	3h	post hoc analysis		Day -1 vs. day 4		p=2.5e-15		bonferroni
	3h	post hoc analysis		Day -1 vs. day 5		p=2.03e-16		bonferroni
	3h	post hoc analysis		Day -1 vs. day 8		p=4.3e-19		bonferroni
	3h	post hoc analysis		Day -1 vs. day 15		p=2.9e-26		bonferroni
	3h	post hoc analysis		Day -1 vs. day 25		p=1.9e-11		bonferroni
	3h	post hoc analysis		Day -1 vs. day 35		p=4.9e-04		bonferroni
	3h	post hoc analysis		Day -1 vs. day 45		p=5.3e-06		bonferroni
	3h	Anova	169	Inhibition across days (non-recovered)	mean +/- SEM	p=1.73e-13	F(12)=8.6
	3h	post hoc analysis		Day -1 vs. day -3		p=10.76		bonferroni
	3h	post hoc analysis		Day -1 vs. day 0		p=9.39		bonferroni
	3h	post hoc analysis		Day -1 vs. day 1		p=0.709		bonferroni
	3h	post hoc analysis		Day -1 vs. day 2		p=0.128		bonferroni
	3h	post hoc analysis		Day -1 vs. day 3		p=0.1559		bonferroni
	3h	post hoc analysis		Day -1 vs. day 4		p=0.526		bonferroni
	3h	post hoc analysis		Day -1 vs. day 5		p=0.0725		bonferroni
	3h	post hoc analysis		Day -1 vs. day 8		p=0.0207		bonferroni
	3h	post hoc analysis		Day -1 vs. day 15		p=6.9e-06		bonferroni
	3h	post hoc analysis		Day -1 vs. day 25		p=0.00043		bonferroni
	3h	post hoc analysis		Day -1 vs. day 35		p=0.00017		bonferroni
	3h	post hoc analysis		Day -1 vs. day 45		p=4.18e-11		bonferroni
	3h	Anova	156	Inhibition across days (control)	mean +/- SEM	p=0.064	F(12)=1.75
	4b	Spearman correlation	25	BBN threshold day 50 vs. Inhibition days 6-10 (ouabain)		p=4.7e-8
	4b	Spearman correlation	16	BBN threshold day 50 vs. Inhibition days 6-10 (noise exposure)		p=0.045
	4d	Spearman correlation	25	BBN threshold day 50 vs. spontaneous fr days 6-10 (ouabain)		p=7.3e-7
	4d	Spearman correlation	16	BBN threshold day 50 vs.spontaneous fr days 6-10 (noise exposure)		p=0.55
