# Supplementary figures and images for: Fast-spiking GABA circuit dynamics in the auditory cortex predict recovery of sensory processing following peripheral nerve damage
Source: eLife journal article supplement (doi:10.7554/elife.21452), 2017-03-21

Figure 3, figure supplement 1 - Resnik and Polley

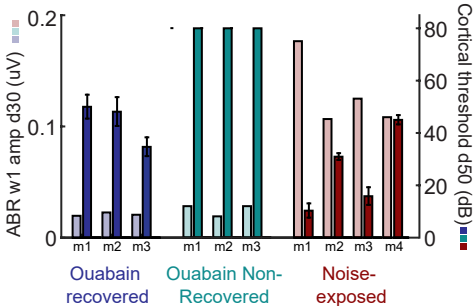

Supplement: supp [file elife-21452-supp-v1.zip]

Figure 4, figure supplement 1- Resnik and Polley

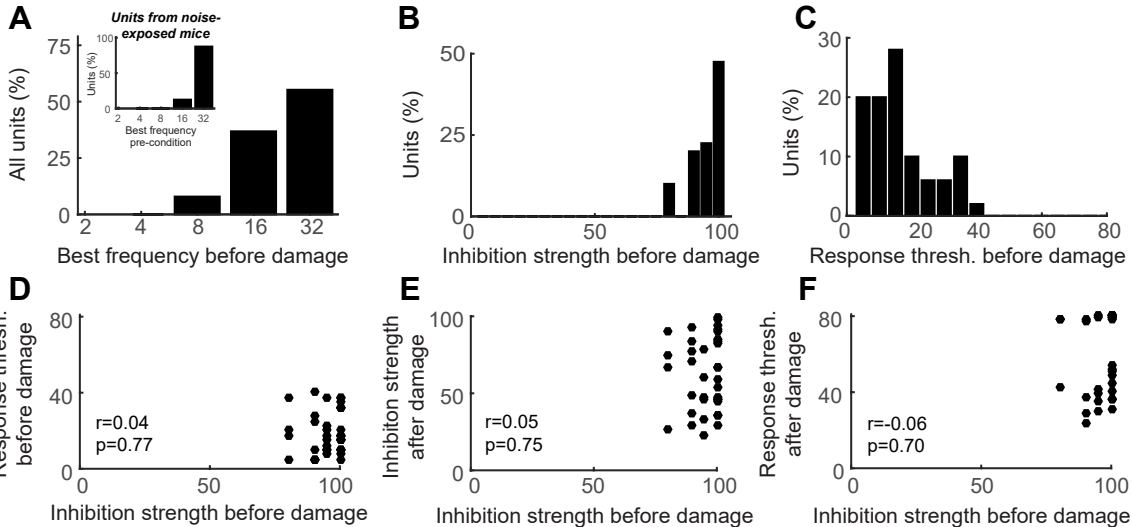

Supplement: supp [file elife-21452-supp-v1.zip]
